# Supplementary material for: Mechanistic study of Eu single atoms occupying four vacancy centers as potential electrocatalysts for the oxygen reduction reaction
Source: Royal Society of Chemistry journal article supplement (doi:10.1039/d3cp04719a), 2023-12-13
Supplement: d3cp04719a1.pdf [file d3cp04719a1.pdf]

## Electronic Supplementary Information

### **Mechanistic study of Eu single atoms occupying four vacancy centers as potential electrocatalysts for oxygen reduction reaction**

Qiming Fu <sup>a</sup>, Daomiao Wang <sup>a,\*</sup>, Chao Liu <sup>a,\*</sup>

<sup>a</sup> School of Materials Science and Engineering, Faculty of Materials Metallurgy and Chemistry, Jiangxi University of Science and Technology, Ganzhou 341000, People's Republic of China

\* Corresponding author. E-mail: wdm13695745728@163.com (Daomiao Wang), liuchao198967@126.com (Chao Liu)

## S1. Calculation method

All DFT calculations in this article are performed using the DMol<sup>3</sup> module in Material Studio software.<sup>1</sup> The effects of electron exchange and correlation are described by choosing the Generalized Gradient Approximation (GGA) in Perdew Burke Ernzerhof (PBE). This study used DFT-D with Grimme method to correct for van der Waals interactions. When simulating the water (H<sub>2</sub>O) environment, a conductor like shielding model (COSMO) with a dielectric constant of 78.54 was used.<sup>2</sup> DFT semi nuclear pseudopotential was used in the calculation to handle nuclear electrons, and the basis set of the 4.4 version of the dual numerical positive polarization (DNP) function was used. In addition, in order to deal with the Eu element, the density functional semi-core pseudo potential (DSPP) approximation is also used. To ensure the accuracy of the results, convergence tolerances were set for energy, displacement, and force to  $1.0 \times 10^{-5}$  Ha, 0.05 Å, and  $0.02 \text{ Ha} \cdot \text{Å}^{-1}$ , respectively. Monkhorst Pack K point grid set to  $5 \times 5 \times 1$ , and the real space global orbital cutoff radius was set as high as 5.8 Å.

The adsorption free energy can be used to describe the thermodynamic stability of the adsorption process, that is, whether the adsorption process will occur spontaneously.

Calculate using the following formula:

$$\Delta G_{*OOH} = G_{*OOH} - G_* - \left( 2G_{H_2O} - \frac{3}{2}G_{H_2} \right) \quad (1)$$

$$\Delta G_{*O} = G_{*O} - G_* - (G_{H_2O} - G_{H_2}) \quad (2)$$

$$\Delta G_{*OH} = G_{*OH} - G_* - \left( G_{H_2O} - \frac{1}{2}G_{H_2} \right) \quad (3)$$

$$\Delta G_{*2OH} = G_{*2OH} - G_* - (2G_{H_2O} - G_{H_2}) \quad (4)$$

Where  $G_{*OOH}$ ,  $G_{*O}$  and  $G_{*OH}$  are the free energy of reaction intermediates, and  $G_*$  is the energy of pristine catalyst.

The reaction of each electron transfer step can be calculated using the following formula:<sup>3</sup>

$$\Delta G_i = \Delta E_i + \Delta ZPE_i - T\Delta S_i + \Delta G_U + \Delta G_{pH} \quad (5)$$

here  $\Delta E_i$ ,  $\Delta ZPE_i$ ,  $\Delta S_i$ ,  $\Delta G_U$  and  $\Delta G_{pH}$  represents the reaction heat of each reaction

electron, zero vibration energy, entropy change, potential, and the influence of pH in each step.  $\Delta G_U = -eU$  and  $\Delta G_{pH} = pH \times k_B \times T \times \ln 10$ , where  $U$ ,  $T$ ,  $pH$ , and  $k_B$  is the applied potential, temperature, hydrogen ion index and Boltzmann constant respectively. T is at room temperature, 298.15K.

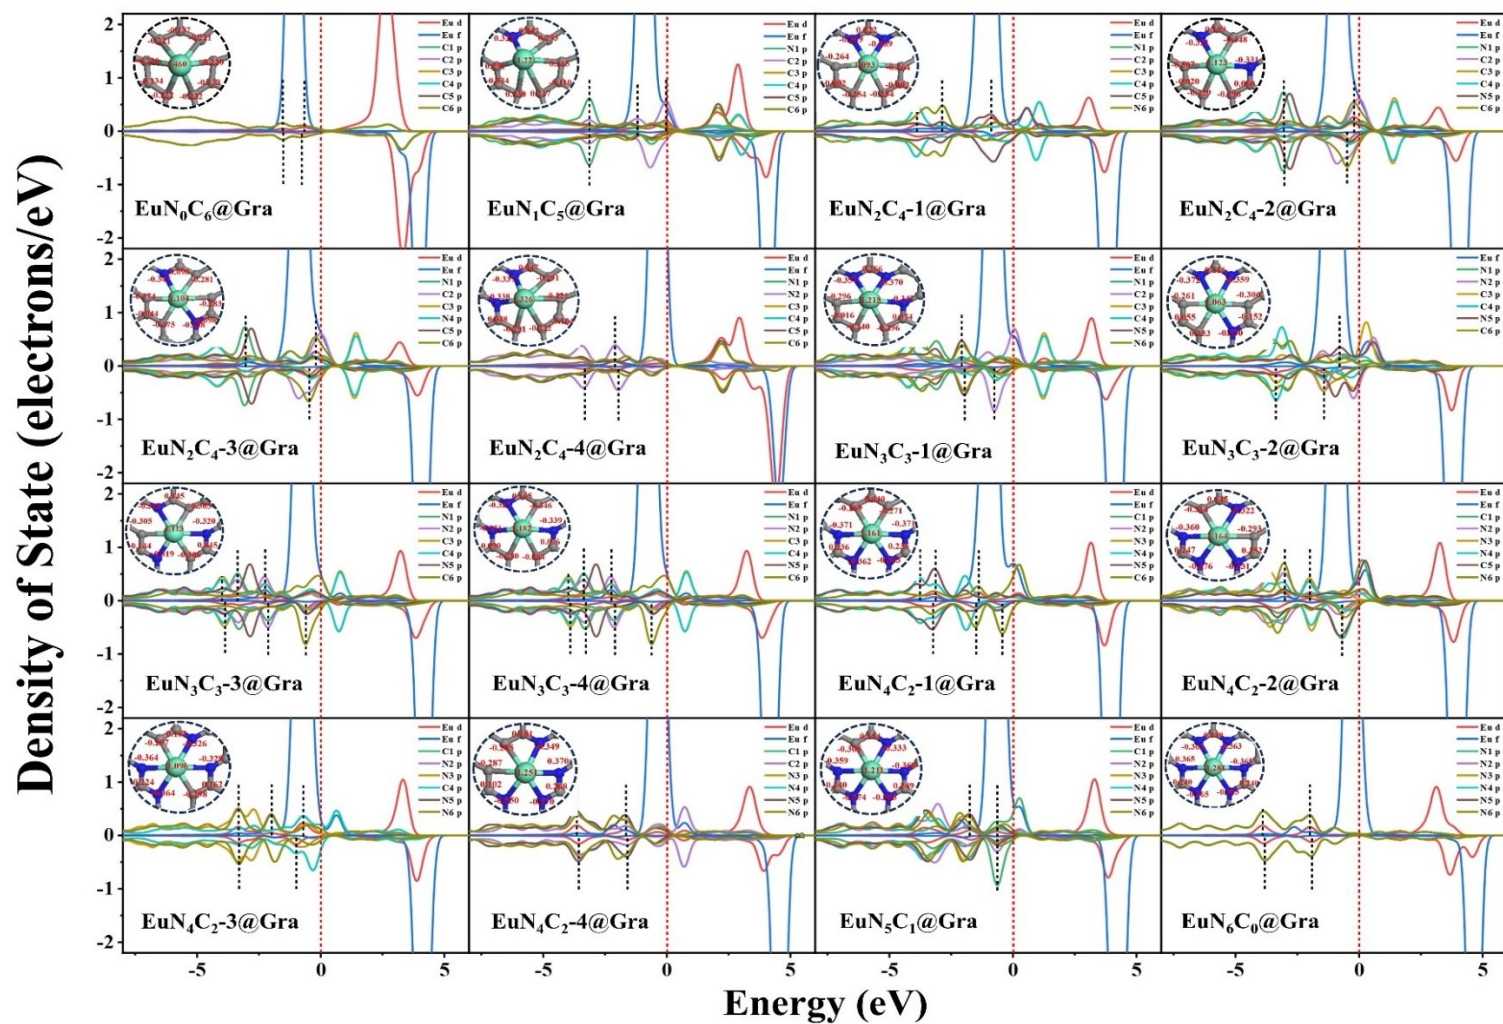

Fig. S1 The projected density of states (PDOS) and the Mulliken population analysis of  $\text{EuN}_x\text{C}_{6-x}\text{-Gra}$ .

**Table S1** The optimal adsorption configurations of \*O<sub>2</sub>, \*OOH, \*O, \*OH, \*2OH and \*H<sub>2</sub>O on EuN<sub>x</sub>C<sub>6-x</sub>-Gra.

| EuN <sub>0</sub> C <sub>6</sub> -Gra   | *O <sub>2</sub> (side-on)                                                           | *OOH                                                                                | *O                                                                                  | *OH                                                                                  | *2OH                                                                                  | *H <sub>2</sub> O                                                                     |
|----------------------------------------|-------------------------------------------------------------------------------------|-------------------------------------------------------------------------------------|-------------------------------------------------------------------------------------|--------------------------------------------------------------------------------------|---------------------------------------------------------------------------------------|---------------------------------------------------------------------------------------|
| Top                                    | 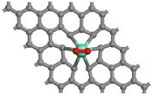   |    |    |    |    |    |
| Side                                   |    |    |    |    |    |    |
| $\Delta E_{ads}/eV$                    | -1.33                                                                               | -1.44                                                                               | -2.77                                                                               | 0.46                                                                                 | -5.13                                                                                 | 1.25                                                                                  |
| EuN <sub>1</sub> C <sub>5</sub> -Gra   | *O <sub>2</sub> (side-on)                                                           | *OOH                                                                                | *O                                                                                  | *OH                                                                                  | *2OH                                                                                  | *H <sub>2</sub> O                                                                     |
| Top                                    |    |    |    |    |    |    |
| Side                                   |    |    |    |    |    |    |
| $\Delta E_{ads}/eV$                    | -1.20                                                                               | -1.87                                                                               | -2.60                                                                               | -3.06                                                                                | -5.25                                                                                 | -0.64                                                                                 |
| EuN <sub>2</sub> C <sub>4</sub> -1-Gra | *O <sub>2</sub> (side-on)                                                           | *OOH                                                                                | *O                                                                                  | *OH                                                                                  | *2OH                                                                                  | *H <sub>2</sub> O                                                                     |
| Top                                    |  |  |  |  |  |  |
| Side                                   |  |  |  |  |  |  |
| $\Delta E_{ads}/eV$                    | -0.60                                                                               | -1.37                                                                               | -1.75                                                                               | -2.43                                                                                | -5.98                                                                                 | -0.60                                                                                 |
| EuN <sub>2</sub> C <sub>4</sub> -2-Gra | *O <sub>2</sub> (side-on)                                                           | *OOH                                                                                | *O                                                                                  | *OH                                                                                  | *2OH                                                                                  | *H <sub>2</sub> O                                                                     |
| Top                                    |  |  |  |  |  |  |
| Side                                   |  |  |  |  |  |  |
| $\Delta E_{ads}/eV$                    | -0.84                                                                               | -1.44                                                                               | -2.16                                                                               | -2.47                                                                                | -4.60                                                                                 | -0.54                                                                                 |
| EuN <sub>2</sub> C <sub>4</sub> -3-Gra | *O <sub>2</sub> (side-on)                                                           | *OOH                                                                                | *O                                                                                  | *OH                                                                                  | *2OH                                                                                  | *H <sub>2</sub> O                                                                     |
| Top                                    |  |  |  |  |  |  |

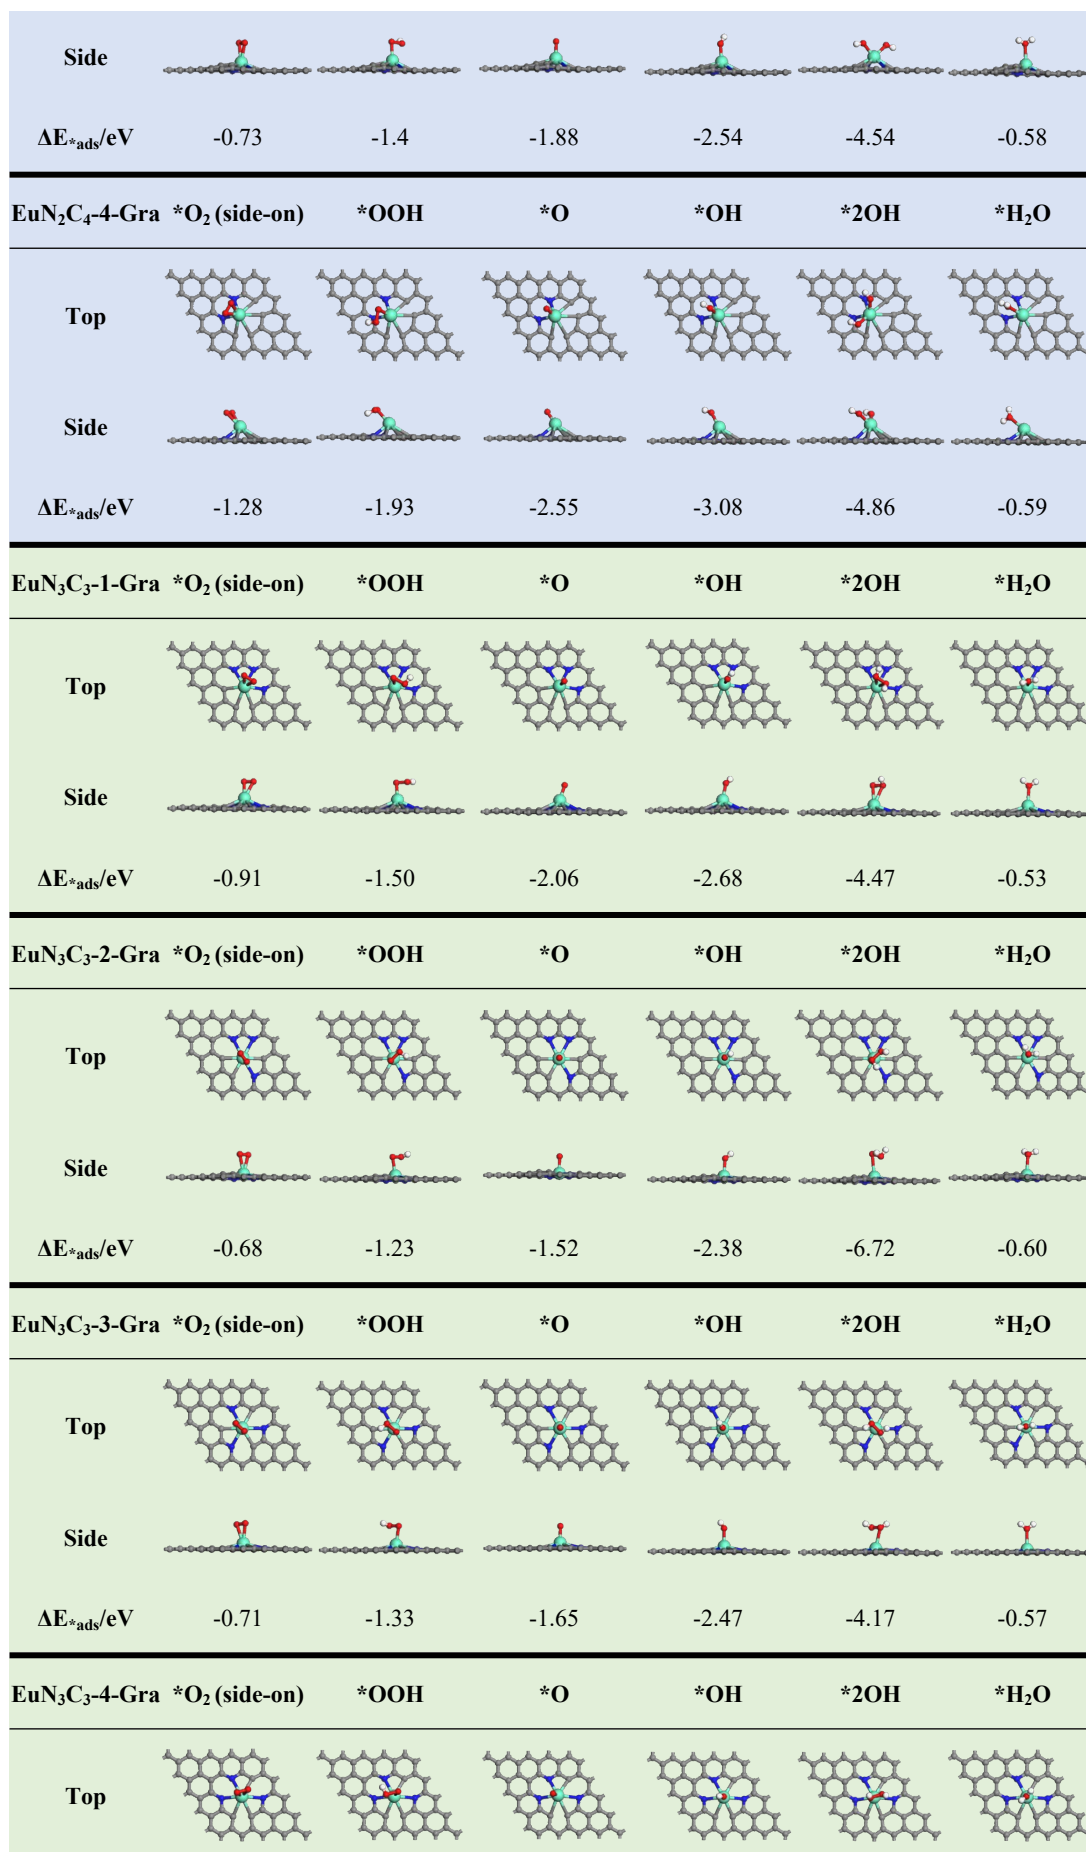

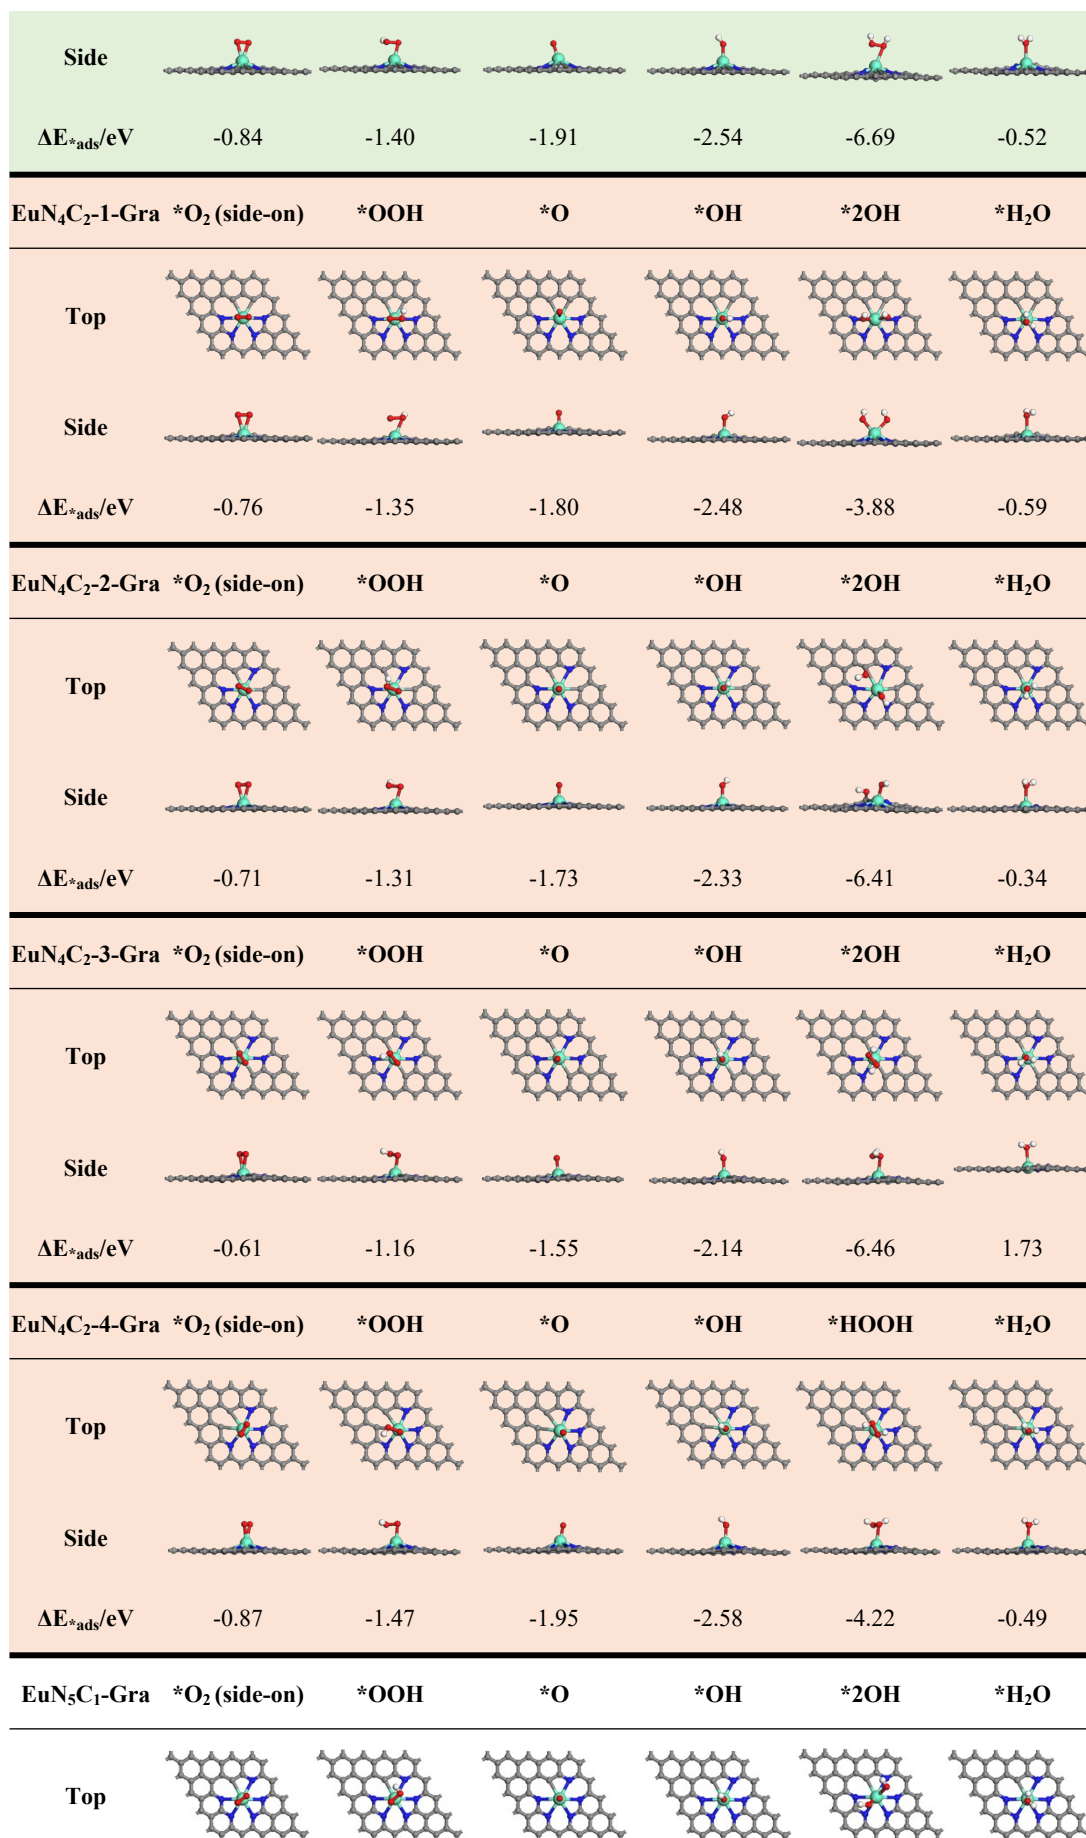

|                                         |                                                                                   |                                                                                   |                                                                                   |                                                                                    |                                                                                     |                                                                                     |
|-----------------------------------------|-----------------------------------------------------------------------------------|-----------------------------------------------------------------------------------|-----------------------------------------------------------------------------------|------------------------------------------------------------------------------------|-------------------------------------------------------------------------------------|-------------------------------------------------------------------------------------|
| Side                                    | 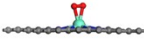 |  |  |  |  |  |
| $\Delta E_{*ads}/eV$                    | -0.71                                                                             | -1.30                                                                             | -1.70                                                                             | -2.42                                                                              | -3.18                                                                               | -0.58                                                                               |
| <b>EuN<sub>6</sub>C<sub>0</sub>-Gra</b> | <b>*O<sub>2</sub> (side-on)</b>                                                   | <b>*OOH</b>                                                                       | <b>*O</b>                                                                         | <b>*OH</b>                                                                         | <b>*2OH</b>                                                                         | <b>*H<sub>2</sub>O</b>                                                              |
| Top                                     |  |  |  |  |  |  |
| Side                                    |  |  |  |  |  |  |
| $\Delta E_{*ads}/eV$                    | -0.84                                                                             | -1.42                                                                             | -1.77                                                                             | -2.52                                                                              | -3.66                                                                               | -0.12                                                                               |



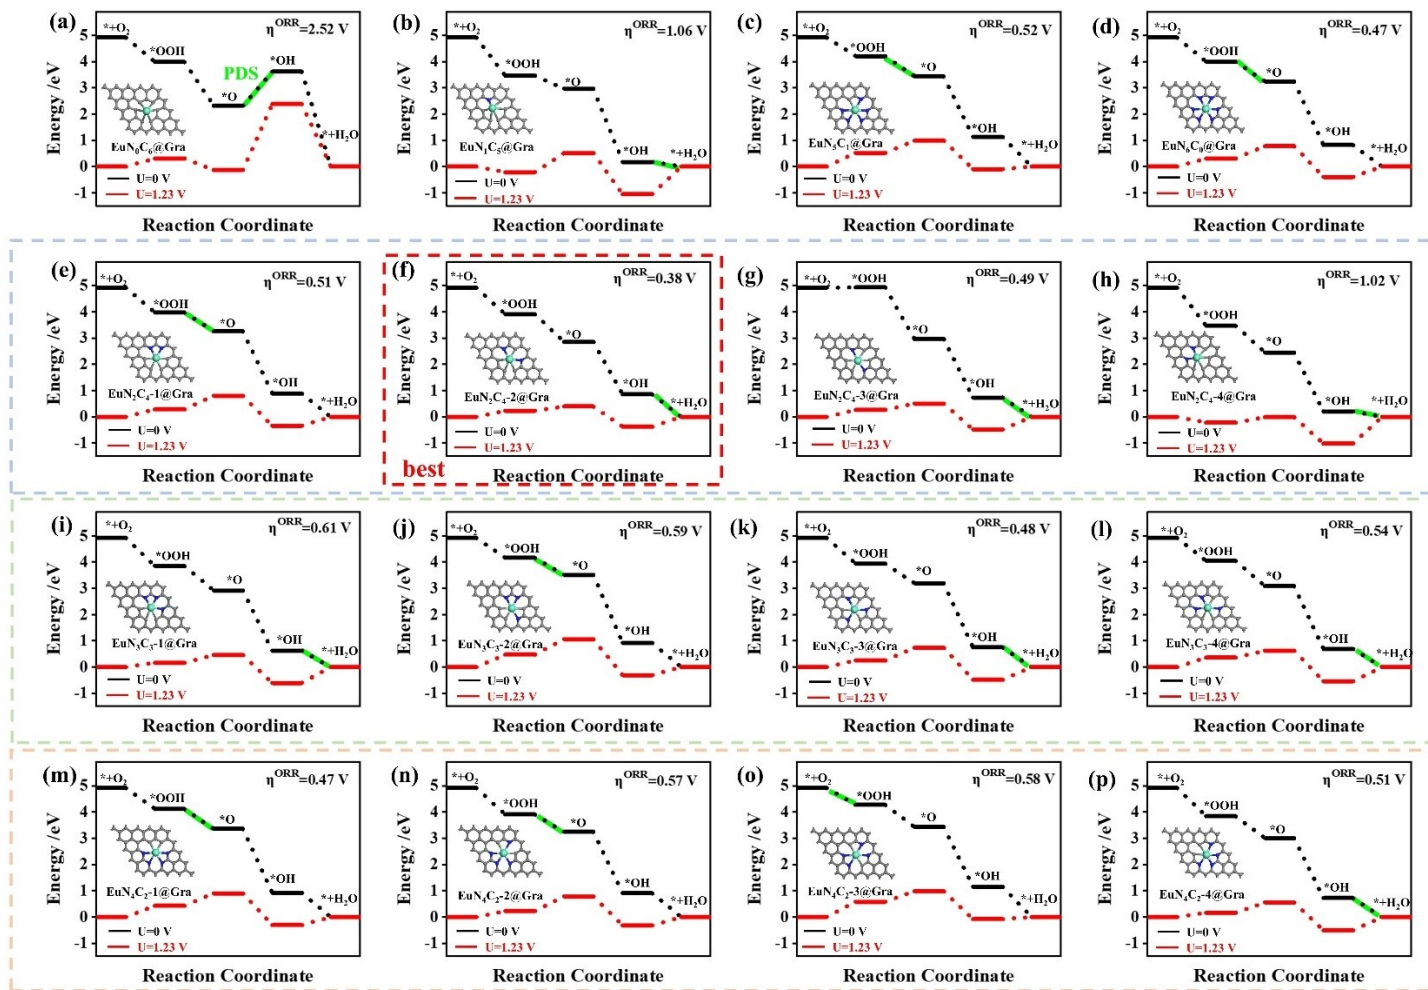

Fig. S2 The free energy diagrams of  $\text{EuN}_x\text{C}_{6-x}\text{-Gra}$  electrocatalysts.

**Table S2** The adsorption free energy of \*OOH, \*O, \*OH and \*2OH and the overpotential of EuN<sub>x</sub>C<sub>6-x</sub>-Gra.

|                                        | $\Delta G^{*OOH}/\text{eV}$ | $\Delta G^{*O}/\text{eV}$ | $\Delta G^{*OH}/\text{eV}$ | $\Delta G^{*2OH}/\text{eV}$ | $\eta^{\text{ORR}}/\text{V}$ |
|----------------------------------------|-----------------------------|---------------------------|----------------------------|-----------------------------|------------------------------|
| EuN <sub>0</sub> C <sub>6</sub> -Gra   | 3.99                        | 2.32                      | 3.61                       | 1.54                        | 2.52                         |
| EuN <sub>1</sub> C <sub>5</sub> -Gra   | 3.46                        | 2.97                      | 0.17                       | 1.26                        | 1.06                         |
| EuN <sub>2</sub> C <sub>4</sub> -1-Gra | 3.98                        | 3.26                      | 0.88                       | 0.85                        | 0.51                         |
| EuN <sub>2</sub> C <sub>4</sub> -2-Gra | 3.91                        | 2.86                      | 0.85                       | 2.10                        | 0.38                         |
| EuN <sub>2</sub> C <sub>4</sub> -3-Gra | 3.95                        | 2.96                      | 0.74                       | 2.09                        | 0.49                         |
| EuN <sub>2</sub> C <sub>4</sub> -4-Gra | 3.47                        | 2.44                      | 0.21                       | 1.74                        | 1.02                         |
| EuN <sub>3</sub> C <sub>3</sub> -1-Gra | 3.85                        | 2.92                      | 0.62                       | 2.10                        | 0.61                         |
| EuN <sub>3</sub> C <sub>3</sub> -2-Gra | 4.16                        | 3.52                      | 0.92                       | 0.22                        | 0.59                         |
| EuN <sub>3</sub> C <sub>3</sub> -3-Gra | 3.94                        | 3.19                      | 0.75                       | 2.44                        | 0.48                         |
| EuN <sub>3</sub> C <sub>3</sub> -4-Gra | 4.05                        | 3.09                      | 0.69                       | 0.04                        | 0.54                         |
| EuN <sub>4</sub> C <sub>2</sub> -1-Gra | 4.12                        | 3.36                      | 0.92                       | 2.75                        | 0.47                         |
| EuN <sub>4</sub> C <sub>2</sub> -2-Gra | 3.91                        | 3.25                      | 0.91                       | 0.50                        | 0.57                         |
| EuN <sub>4</sub> C <sub>2</sub> -3-Gra | 4.27                        | 3.44                      | 1.15                       | 0.40                        | 0.58                         |
| EuN <sub>4</sub> C <sub>2</sub> -4-Gra | 3.85                        | 3.01                      | 0.72                       | 2.36                        | 0.51                         |
| EuN <sub>5</sub> C <sub>1</sub> -Gra   | 4.21                        | 3.44                      | 1.12                       | 3.81                        | 0.52                         |
| EuN <sub>6</sub> C <sub>0</sub> -Gra   | 4.00                        | 3.24                      | 0.82                       | 2.81                        | 0.47                         |

**Table S3** The d-band and f-band centers of EuN<sub>x</sub>C<sub>6-x</sub>-Gra.

|                                        | $\varepsilon_f$ | $\varepsilon_d$ |                                        | $\varepsilon_f$ | $\varepsilon_d$ |
|----------------------------------------|-----------------|-----------------|----------------------------------------|-----------------|-----------------|
| EuN <sub>0</sub> C <sub>6</sub> -Gra   | 0.41            | 2.27            | EuN <sub>5</sub> C <sub>1</sub> -Gra   | 1.40            | 0.80            |
| EuN <sub>1</sub> C <sub>5</sub> -Gra   | 0.68            | 1.32            | EuN <sub>6</sub> C <sub>0</sub> -Gra   | 1.61            | 1.06            |
| EuN <sub>2</sub> C <sub>4</sub> -1-Gra | 0.81            | 0.02            | EuN <sub>2</sub> C <sub>4</sub> -3-Gra | 0.88            | 0.19            |
| EuN <sub>2</sub> C <sub>4</sub> -2-Gra | 1.00            | 0.19            | EuN <sub>2</sub> C <sub>4</sub> -4-Gra | 0.46            | 2.26            |
| EuN <sub>3</sub> C <sub>3</sub> -1-Gra | 1.12            | 0.56            | EuN <sub>3</sub> C <sub>3</sub> -3-Gra | 0.99            | 0.01            |
| EuN <sub>3</sub> C <sub>3</sub> -2-Gra | 0.83            | 0.04            | EuN <sub>3</sub> C <sub>3</sub> -4-Gra | 1.14            | 0.72            |
| EuN <sub>4</sub> C <sub>2</sub> -1-Gra | 1.08            | 0.48            | EuN <sub>4</sub> C <sub>2</sub> -3-Gra | 1.19            | 0.65            |
| EuN <sub>4</sub> C <sub>2</sub> -2-Gra | 1.12            | 0.61            | EuN <sub>4</sub> C <sub>2</sub> -4-Gra | 1.53            | 0.97            |

## References

- 1 B. Delley, From molecules to solids with the DMol3 approach, *J. Chem. Phys.*, 2000, **113**, 7756-7764.
- 2 T. Todorova, B.J.M.S. Delley, Wetting of paracetamol surfaces studied by DMol3-COSMO calculations, *Mol. Phys.*, 2008, **34**, 1013-1017.
- 3 X. Li, Z. Su, Z. Zhao, Q. Cai, Y. Li, J. Zhao, Single Ir atom anchored in pyrrolic-N<sub>4</sub> doped graphene as a promising bifunctional electrocatalyst for the ORR/OER: a computational study, *J. Colloid Interface Sci.*, 2022, **607**, 1005-1013.
